# Supplementary material
Source: MDPI journal article supplement (https://www.mdpi.com/2073-4441/13/14/1971)
Supplement: s1 [file s1 › water-1291499-supplementary.pdf]

---

## Supplementary data

This part is the results of relationship between Vcmax25 and LWC for different treatments in 2013-2015.

### *Relationship between Vcmax25 and LWC in maize*

Photosynthesis is the basis of crop growth and development. Vcmax25 can strongly reflect the photosynthetic capacity of plants. In this study, the relationship between Vcmax25 and LWC were analyzed, we found there was a significant quadratic relationship between Vcmax25 and LWC (Figures S1-3, Table S1). Vcmax25 first increased with the increase of LWC, and decreased gradually with the increase of LWC once LWC reached a certain threshold. In 2013, when the LWC of D1–D6 treatments was 81.7%, 83.2%, 82.4%, 82.5%, 82.3%, and 83.1%, respectively, Vcmax25 reached the maximum values of 49.5, 45.2, 45.7, 45.9, 46.2, and 45.7  $\mu\text{mol m}^{-2} \text{s}^{-1}$ , respectively. When LWC was 67.2%, 66.5%, 65.7%, 67.0%, 67.1%, and 68.1% for treatments D1–D6, respectively, Vcmax25 decreased to zero. In 2014, when the LWC of the D1–D6 treatments was 82.3%, 82.8%, 82.6%, 80.9%, 80.2%, and 80.7%, respectively, Vcmax25 reached the maximum values of 41.8, 45.7, 43.4, 42.2, 41.5, and 38.8  $\mu\text{mol m}^{-2} \text{s}^{-1}$  respectively. When LWC of the D1–D6 treatments was 67.2%, 67.7%, 67.2%, 68.8%, 68.9%, and 65.9%, respectively, Vcmax25 decreased to zero. In 2015, when the water content of the D1 and D2 treatments was 87.0% and 81.0%, respectively, Vcmax25 reached the maximum values of 44.8 and 40.1  $\mu\text{mol m}^{-2} \text{s}^{-1}$ , respectively. Vcmax25 decreased to zero when the water content of the D1 and D2 treatments was 68.3% and 69.9%, respectively.

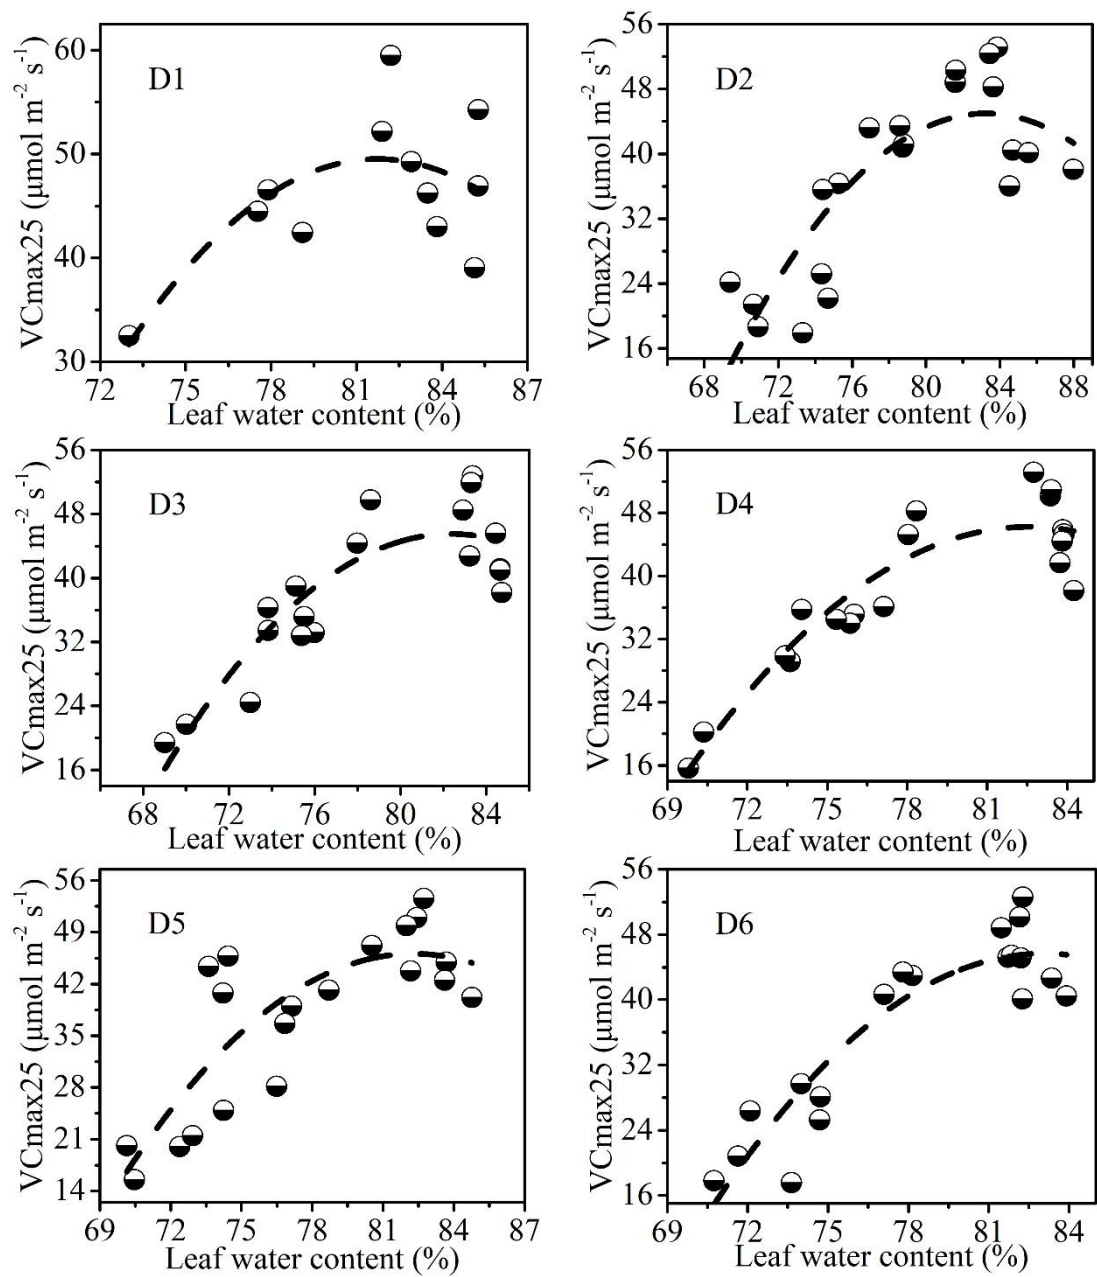

Figure S1. Relationship between LWC and Vcmax25 for various treatments in 2013

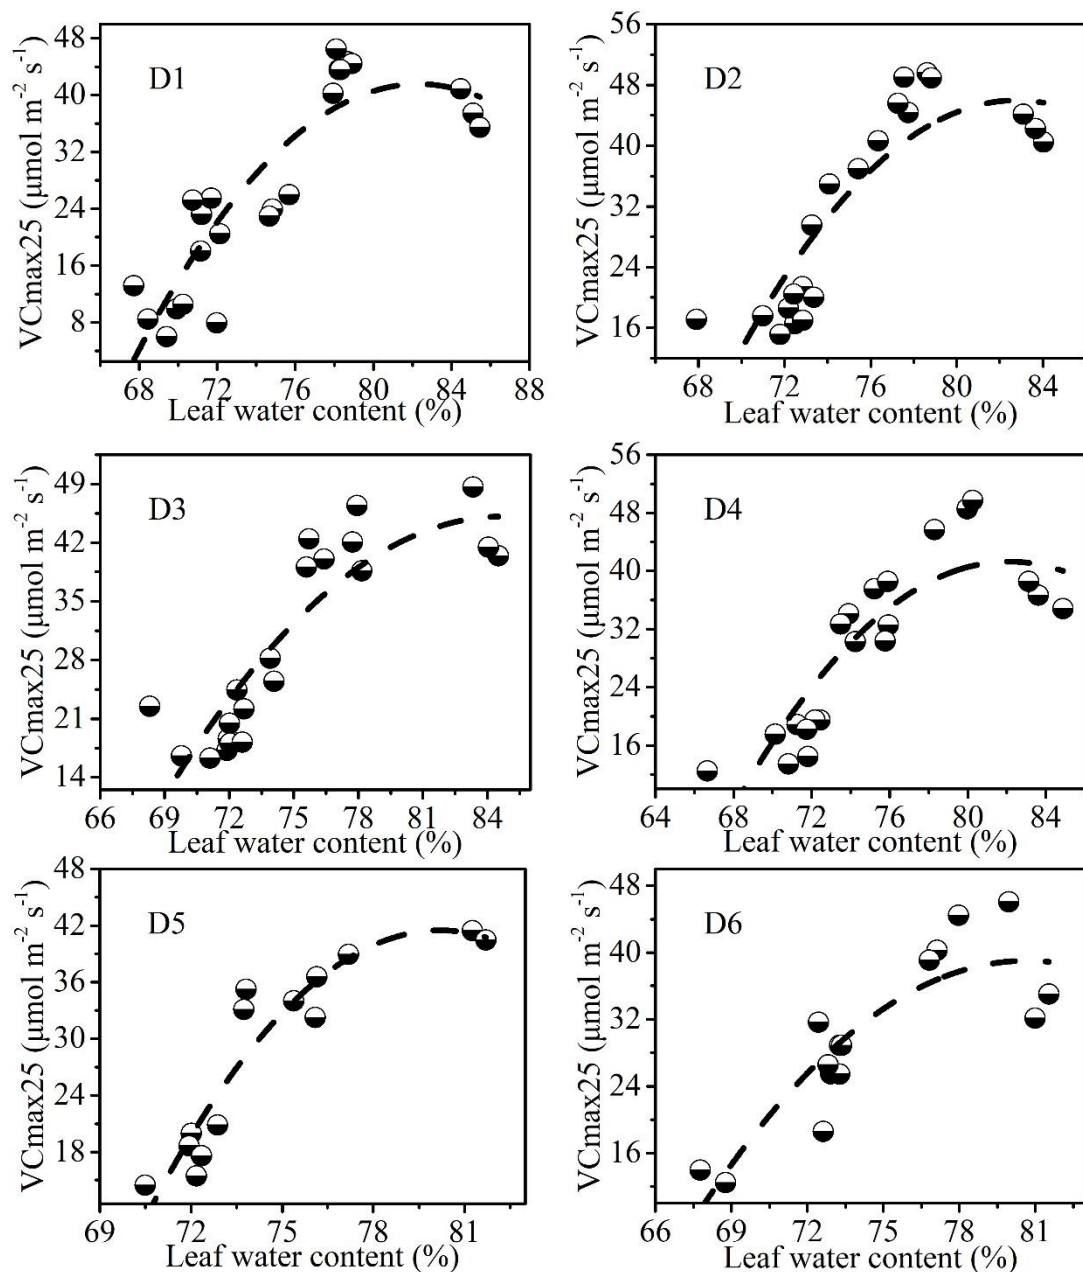

Figure S2. Relationship between LWC and Vcmax25 for various treatments in 2014

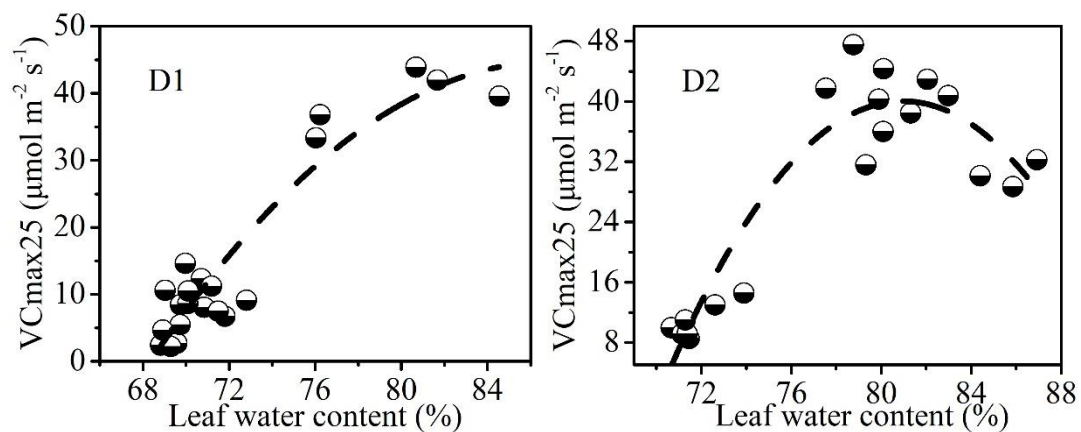

Figure S3. Relationship between LWC and Vcmax25 for various treatments in 2015

Table S1. Regression equation between leaf water content and Vcmax25 during 2013- 2015

| Treatments | Regression equation                          | R2       |
|------------|----------------------------------------------|----------|
| 2013       |                                              |          |
| D1         | $y = -0.23419 x^2 + 38.28476 x - 1515.11707$ | 0.466    |
| D2         | $y = -0.16195 x^2 + 26.95545 x - 1076.67194$ | 0.706*** |
| D3         | $y = -0.16433 x^2 + 27.07084 x - 1069.38874$ | 0.786*** |
| D4         | $y = -0.18936 x^2 + 31.26933 x - 1244.67105$ | 0.857*** |
| D5         | $y = -0.19941 x^2 + 32.81951 x - 1304.30349$ | 0.669*** |
| D6         | $y = -0.20281 x^2 + 33.69543 x - 1353.90237$ | 0.843*** |
| 2014       |                                              |          |
| D1         | $y = -0.18224 x^2 + 30.00415 x - 1193.44963$ | 0.794*** |
| D2         | $y = -0.20057 x^2 + 33.20223 x - 1328.11044$ | 0.752*** |
| D3         | $y = -0.13549 x^2 + 22.95114 x - 926.83676$  | 0.768*** |
| D4         | $y = -0.16954 x^2 + 27.84205 x - 1101.77816$ | 0.754*** |
| D5         | $y = -0.32501 x^2 + 52.12879 x - 2048.75075$ | 0.882*** |
| D6         | $y = -0.17916 x^2 + 28.90666 x - 1126.96262$ | 0.772*** |
| 2015       |                                              |          |
| D1         | $y = -0.1277 x^2 + 22.23192 x - 922.84757$   | 0.885*** |
| D2         | $y = -0.3315 x^2 + 53.68079 x - 2133.1242$   | 0.887*** |

\*\*\* means the leaf water content and Vcmax25 was significantly related at a 0.001 significant level
